# Supplementary material for: Assessment of Registration Information on Methodological Design of Acupuncture RCTs: A Review of 453 Registration Records Retrieved from WHO International Clinical Trials Registry Platform
Source: Hindawi journal article supplement (doi:10.1155/2014/614850), 2014-01-01
Supplement: f1 [file 614850.f1.pdf]

Text S1 Main ID of all included registration records.

**ClinicalTrials.gov (213 records)**

|             |             |             |             |             |             |             |             |
|-------------|-------------|-------------|-------------|-------------|-------------|-------------|-------------|
| NCT01650363 | NCT01631500 | NCT01369238 | NCT01189994 | NCT01017211 | NCT00142532 | NCT00010647 | NCT00639977 |
| NCT01643577 | NCT01491321 | NCT01350570 | NCT01178008 | NCT01014221 | NCT00136669 | NCT00065403 | NCT00636012 |
| NCT01627444 | NCT01487590 | NCT00010621 | NCT01174394 | NCT01013337 | NCT00104546 | NCT00065234 | NCT00635037 |
| NCT01612663 | NCT01492738 | NCT01331395 | NCT01165099 | NCT01003470 | NCT00094874 | NCT00064740 | NCT00624793 |
| NCT01614639 | NCT01483885 | NCT01338701 | NCT01162018 | NCT01002846 | NCT00093327 | NCT00060021 | NCT00621660 |
| NCT01598974 | NCT01481090 | NCT01357343 | NCT01152632 | NCT00245752 | NCT00090389 | NCT00055354 | NCT00610584 |
| NCT01580280 | NCT01479920 | NCT01315561 | NCT01141231 | NCT00233857 | NCT00090337 | NCT00035399 | NCT00602940 |
| NCT01573858 | NCT01449396 | NCT01283477 | NCT01124955 | NCT00225316 | NCT00086021 | NCT00034047 | NCT00599677 |
| NCT01579786 | NCT01442012 | NCT01285687 | NCT01116453 | NCT00186654 | NCT00081965 | NCT00032422 | NCT00608660 |
| NCT01621139 | NCT01439412 | NCT01275989 | NCT01112943 | NCT00221247 | NCT00071669 | NCT00029497 | NCT00599586 |
| NCT01570127 | NCT01417741 | NCT01276028 | NCT01105221 | NCT00969280 | NCT00065975 | NCT00011024 |             |

|             |             |             |             |             |             |             |  |
|-------------|-------------|-------------|-------------|-------------|-------------|-------------|--|
| NCT01551654 | NCT01411501 | NCT01274793 | NCT01102816 | NCT00969267 | NCT00065585 | NCT00010478 |  |
| NCT01526031 | NCT01398930 | NCT01275807 | NCT01096420 | NCT00957112 | NCT00860301 | NCT00010491 |  |
| NCT01512433 | NCT01395511 | NCT01271595 | NCT00320138 | NCT00952432 | NCT00859365 | NCT00010504 |  |
| NCT00950482 | NCT01389349 | NCT01259180 | NCT00317291 | NCT00945074 | NCT00855140 | NCT00724763 |  |
| NCT00570024 | NCT01389622 | NCT01247935 | NCT00317317 | NCT00932061 | NCT00843765 | NCT00722462 |  |
| NCT00598988 | NCT01368393 | NCT01231776 | NCT00312585 | NCT00921492 | NCT00839592 | NCT00010764 |  |
| NCT00554879 | NCT01360229 | NCT01304979 | NCT00302185 | NCT00917215 | NCT00838994 | NCT00692328 |  |
| NCT00549835 | NCT00464425 | NCT00404443 | NCT01102868 | NCT00913354 | NCT00797732 | NCT00689897 |  |
| NCT00544401 | NCT00460161 | NCT00355329 | NCT01079390 | NCT00900965 | NCT00826345 | NCT00685789 |  |
| NCT00528125 | NCT00459680 | NCT00353847 | NCT01060553 | NCT00892268 | NCT00826215 | NCT00682162 |  |
| NCT00523016 | NCT00455182 | NCT00352248 | NCT01055561 | NCT00885586 | NCT00826397 | NCT00674713 |  |
| NCT00508482 | NCT00449241 | NCT01218243 | NCT01054495 | NCT00885183 | NCT00786214 | NCT00655317 |  |
| NCT00425412 | NCT00432289 | NCT01231425 | NCT01050075 | NCT00882271 | NCT00779818 | NCT00646633 |  |
| NCT00417313 | NCT00430378 | NCT01205958 | NCT01049074 | NCT00874133 | NCT00813683 | NCT00000394 |  |

|             |             |             |             |             |             |             |  |
|-------------|-------------|-------------|-------------|-------------|-------------|-------------|--|
| NCT00414505 | NCT00379327 | NCT01201642 | NCT01047384 | NCT00868517 | NCT00804089 | NCT00002149 |  |
| NCT00405158 | NCT00375102 | NCT00261755 | NCT01037894 | NCT00200096 | NCT00758017 | NCT01447329 |  |
| NCT00334165 | NCT00284492 | NCT00260494 | NCT01030029 | NCT00148577 | NCT00746200 | NCT00010972 |  |
| NCT00328796 | NCT00279071 | NCT00260637 | NCT01022177 | NCT00142597 | NCT00736411 | NCT00010985 |  |

**ISRCTN (78 records)**

|                |                |                |                |                |                |
|----------------|----------------|----------------|----------------|----------------|----------------|
| ISRCTN29230777 | ISRCTN29932220 | ISRCTN98703707 | ISRCTN59155637 | ISRCTN22366060 | ISRCTN18207278 |
| ISRCTN84709751 | ISRCTN07165558 | ISRCTN02971192 | ISRCTN06223266 | ISRCTN74414962 | ISRCTN48408850 |
| ISRCTN09754699 | ISRCTN12585433 | ISRCTN84496835 | ISRCTN94142364 | ISRCTN52683557 | ISRCTN84841116 |
| ISRCTN15186354 | ISRCTN99496264 | ISRCTN13737091 | ISRCTN11374571 | ISRCTN18249834 | ISRCTN22866867 |
| ISRCTN83626912 | ISRCTN63787732 | ISRCTN07857866 | ISRCTN74335441 | ISRCTN36780548 | ISRCTN92205535 |
| ISRCTN05293321 | ISRCTN34405634 | ISRCTN49839714 | ISRCTN93327878 | ISRCTN28687220 | ISRCTN27450856 |
| ISRCTN76896018 | ISRCTN40932605 | ISRCTN59267538 | ISRCTN78434638 | ISRCTN97373659 | ISRCTN16856737 |
| ISRCTN60217348 | ISRCTN80312467 | ISRCTN49884134 | ISRCTN34841555 | ISRCTN61381178 | ISRCTN01382777 |
| ISRCTN97151578 | ISRCTN90807007 | ISRCTN40706107 | ISRCTN65814467 | ISRCTN23245449 | ISRCTN61111416 |

|                |                |                |                |                |                |
|----------------|----------------|----------------|----------------|----------------|----------------|
| ISRCTN84985339 | ISRCTN24863192 | ISRCTN41920953 | ISRCTN71727409 | ISRCTN12159894 | ISRCTN96537534 |
| ISRCTN39740785 | ISRCTN49335612 | ISRCTN59953486 | ISRCTN52062666 | ISRCTN18747033 | ISRCTN80764175 |
| ISRCTN99395260 | ISRCTN08827905 | ISRCTN32823720 | ISRCTN41571810 | ISRCTN98448646 | ISRCTN88597683 |
| ISRCTN43104115 | ISRCTN88008690 | ISRCTN25134802 | ISRCTN23891318 | ISRCTN74259594 | ISRCTN74318483 |

**ChiCTR (66 records)**

|                     |                     |                     |                     |                     |
|---------------------|---------------------|---------------------|---------------------|---------------------|
| ChiCTR-TRC-12002206 | ChiCTR-TRC-11001379 | ChiCTR-TRC-10001086 | ChiCTR-TRC-09000471 | ChiCTR-TRC-08000138 |
| ChiCTR-TRC-12002081 | ChiCTR-TRC-11001353 | ChiCTR-TRC-10001078 | ChiCTR-TRC-09000455 | ChiCTR-TRC-08000143 |
| ChiCTR-TRC-12002003 | ChiCTR-TRC-11001352 | ChiCTR-TRC-10000902 | ChiCTR-TRC-08000083 | ChiCTR-TRC-08000069 |
| ChiCTR-TRC-12001971 | ChiCTR-TRC-11001349 | ChiCTR-TRC-10000791 | ChiCTR-TRC-08000261 | ChiCTR-TRC-07000036 |
| ChiCTR-TRC-12001972 | ChiCTR-TRC-11001347 | ChiCTR-TRC-10001023 | ChiCTR-ORC-08000305 | ChiCTR-TRC-07000024 |
| ChiCTR-TRC-11001813 | ChiCTR-TRC-11001343 | ChiCTR-TRC-10000950 | ChiCTR-TRC-08000302 | ChiCTR-TRC-07000010 |
| ChiCTR-TRC-11001727 | ChiCTR-TRC-11001310 | ChiCTR-TRC-09000527 | ChiCTR-TRC-08000297 |                     |
| ChiCTR-TRC-11001719 | ChiCTR-TRC-11001256 | ChiCTR-TRC-09000519 | ChiCTR-TRC-08000276 |                     |
| ChiCTR-TRC-11001693 | ChiCTR-TRC-11001257 | ChiCTR-TRC-10000887 | ChiCTR-TRC-08000283 |                     |

|                     |                     |                     |                     |  |
|---------------------|---------------------|---------------------|---------------------|--|
| ChiCTR-TRC-11001655 | ChiCTR-TRC-11001245 | ChiCTR-TRC-10000889 | ChiCTR-TRC-08000278 |  |
| ChiCTR-TRC-10001609 | ChiCTR-TRC-11001201 | ChiCTR-TRC-10000792 | ChiCTR-TRC-08000225 |  |
| ChiCTR-TRC-11001600 | ChiCTR-TRC-11001169 | ChiCTR-TRC-10000807 | ChiCTR-TRC-08000209 |  |
| ChiCTR-TRC-11001540 | ChiCTR-TRC-10001160 | ChiCTR-TRC-10000746 | ChiCTR-TRC-08000184 |  |
| ChiCTR-TRC-11001554 | ChiCTR-TRC-10001146 | ChiCTR-TRC-09000507 | ChiCTR-TRC-08000176 |  |
| ChiCTR-TRC-11001388 | ChiCTR-TRC-10001138 | ChiCTR-ORC-09000505 | ChiCTR-TRC-08000088 |  |

**ANZCTR (52 records)**

|                     |                     |                     |                     |                     |                     |
|---------------------|---------------------|---------------------|---------------------|---------------------|---------------------|
| ACTRN12612000719831 | ACTRN12611000393954 | ACTRN12610000631000 | ACTRN12609000985280 | ACTRN12608000264381 | ACTRN12605000314628 |
| ACTRN12612000705886 | ACTRN12611000288921 | ACTRN12610000626066 | ACTRN12609000928213 | ACTRN12608000239369 | ACTRN12606000494538 |
| ACTRN12612000706875 | ACTRN12611000226909 | ACTRN12610000611022 | ACTRN12609000923268 | ACTRN12608000231347 |                     |
| ACTRN12612000693820 | ACTRN12611000149965 | ACTRN12610000340033 | ACTRN12609000751279 | ACTRN12608000050358 |                     |
| ACTRN12612000667819 | ACTRN12611000113954 | ACTRN12610000232033 | ACTRN12609000698279 | ACTRN12607000499482 |                     |

|                     |                     |                     |                     |                     |  |
|---------------------|---------------------|---------------------|---------------------|---------------------|--|
| ACTRN12612000607875 | ACTRN12611000088943 | ACTRN12610000104055 | ACTRN12609000676213 | ACTRN12607000105448 |  |
| ACTRN12612000096853 | ACTRN12611000025932 | ACTRN12610000043033 | ACTRN12609000480280 | ACTRN12607000015448 |  |
| ACTRN12612000032853 | ACTRN12610001052022 | ACTRN12609001054202 | ACTRN12609000288224 | ACTRN12605000766617 |  |
| ACTRN12611000761965 | ACTRN12610000850077 | ACTRN12609001001280 | ACTRN12609000095268 | ACTRN12605000483651 |  |
| ACTRN12611000614998 | ACTRN12610000720011 | ACTRN12609000989246 | ACTRN12609000073202 | ACTRN12605000367640 |  |

**IRCT (16 records)**

|                    |                    |                    |                    |                    |                    |
|--------------------|--------------------|--------------------|--------------------|--------------------|--------------------|
| IRCT201201108235N1 | IRCT201201127117N2 | IRCT201107267117N1 | IRCT201106036699N1 | IRCT201011275181N4 | IRCT138811163284N1 |
| IRCT201202088956N1 | IRCT201107026934N1 | IRCT138706101061N2 | IRCT201101133004N4 | IRCT138902013767N1 | IRCT201112014578N4 |
| IRCT201111218151N1 | IRCT201108174242N2 | IRCT201104104422N2 | IRCT138902222891N1 |                    |                    |

**JPRN (5 records)**

|                    |                    |                    |                    |                    |
|--------------------|--------------------|--------------------|--------------------|--------------------|
| JPRN-UMIN000007773 | JPRN-UMIN000006167 | JPRN-UMIN000002254 | JPRN-UMIN000001277 | JPRN-UMIN000000994 |
|--------------------|--------------------|--------------------|--------------------|--------------------|

**KCT (11 records)**

|            |            |            |            |            |            |
|------------|------------|------------|------------|------------|------------|
| KCT0000385 | KCT0000269 | KCT0000169 | KCT0000164 | KCT0000130 | KCT0000019 |
| KCT0000383 | KCT0000195 | KCT0000168 | KCT0000153 | KCT0000071 |            |

**EU-CTR (4 records)**

|                        |                        |                        |                        |
|------------------------|------------------------|------------------------|------------------------|
| EUCTR2008-002343-16-IT | EUCTR2006-004698-86-DE | EUCTR2006-000947-24-GB | EUCTR2006-000810-18-GB |
|------------------------|------------------------|------------------------|------------------------|

**DRKS (3 records)**

|              |              |              |
|--------------|--------------|--------------|
| DRKS00003767 | DRKS00003116 | DRKS00000164 |
|--------------|--------------|--------------|

**RBEC 3 (records)**

|            |            |            |
|------------|------------|------------|
| RBR-58yq52 | RBR-59f4yr | RBR-5g7xqh |
|------------|------------|------------|

**NTR 2 (records)**

|         |         |
|---------|---------|
| NTR1987 | NTR1613 |
|---------|---------|
